# Supplementary material for: Motor-like microlasers functioning in biological fluids
Source: Royal Society of Chemistry journal article supplement (doi:10.1039/d2lc00513a), 2022-01-01
Supplement: d2lc00513a1.pdf [file d2lc00513a1.pdf]

## Supplementary Information

# Motor-like Microlasers Functioning in Biological Fluids

Ziyihui Wang<sup>1,2</sup>, Linwei Shang<sup>2</sup>, Zehang Gao,<sup>3,4</sup> Kok Ken Chan<sup>2</sup>, Chaoyang Gong<sup>2</sup>,  
Chenlu Wang<sup>2</sup>, Tianhua Xu<sup>1,5</sup>, Tiegeng Liu<sup>1</sup>, Shilun Feng<sup>3\*</sup>, Yu-Cheng Chen<sup>2\*</sup>

<sup>1</sup> School of Precision Instrument and Opto-Electronics Engineering, Tianjin University,  
Tianjin 300072, China

<sup>2</sup> School of Electrical and Electronics Engineering, Nanyang Technological University,  
50 Nanyang Ave., Singapore 639798, Singapore

<sup>3</sup>State Key Laboratory of Transducer Technology, Shanghai Institute of Microsystem and  
Information Technology, Chinese Academy of Science, Shanghai, 200050, China

<sup>4</sup>Department of Clinical Laboratory, Third Affiliated Hospital of Guangzhou Medical  
University, Guangdong 510150, China

<sup>5</sup>School of Engineering, University of Warwick, Coventry, CV4 7AL, United Kingdom

\*Correspondence Email for Shilun Feng: [shilun.feng@mail.sim.ac.cn](mailto:shilun.feng@mail.sim.ac.cn)

\*Correspondence Email for Yu-Cheng Chen: [yucchen@ntu.edu.sg](mailto:yucchen@ntu.edu.sg)

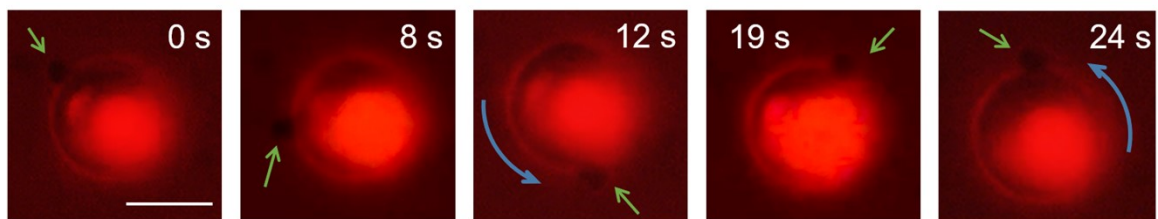

**Figure S1** Self-rotation of NR-doped lasing micromotor by employing the rotating magnetic field at different times. The green arrow shows the position of comparable reference attached to the lasing micromotor. Scale bar: 20  $\mu\text{m}$ .

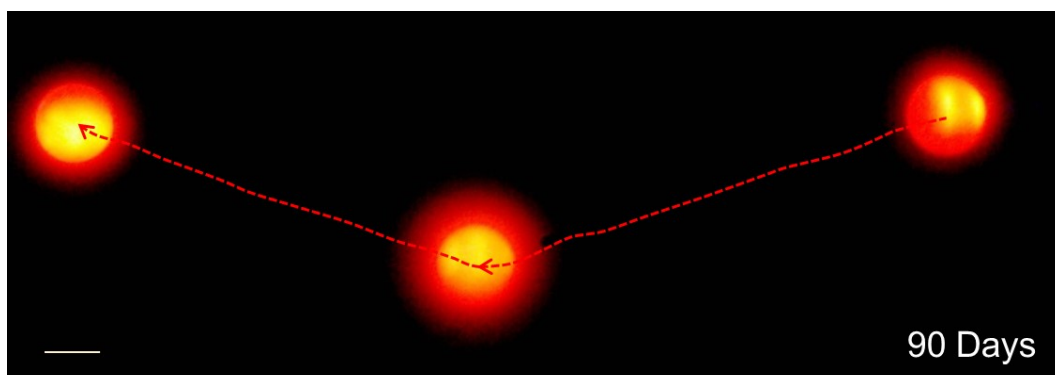

**Figure S2** Lasing micromotor after 90 days storage (with 0.1 wt% MNPs doped, and 10 Gs external magnetic field applied). Scale bar: 20  $\mu\text{m}$ .

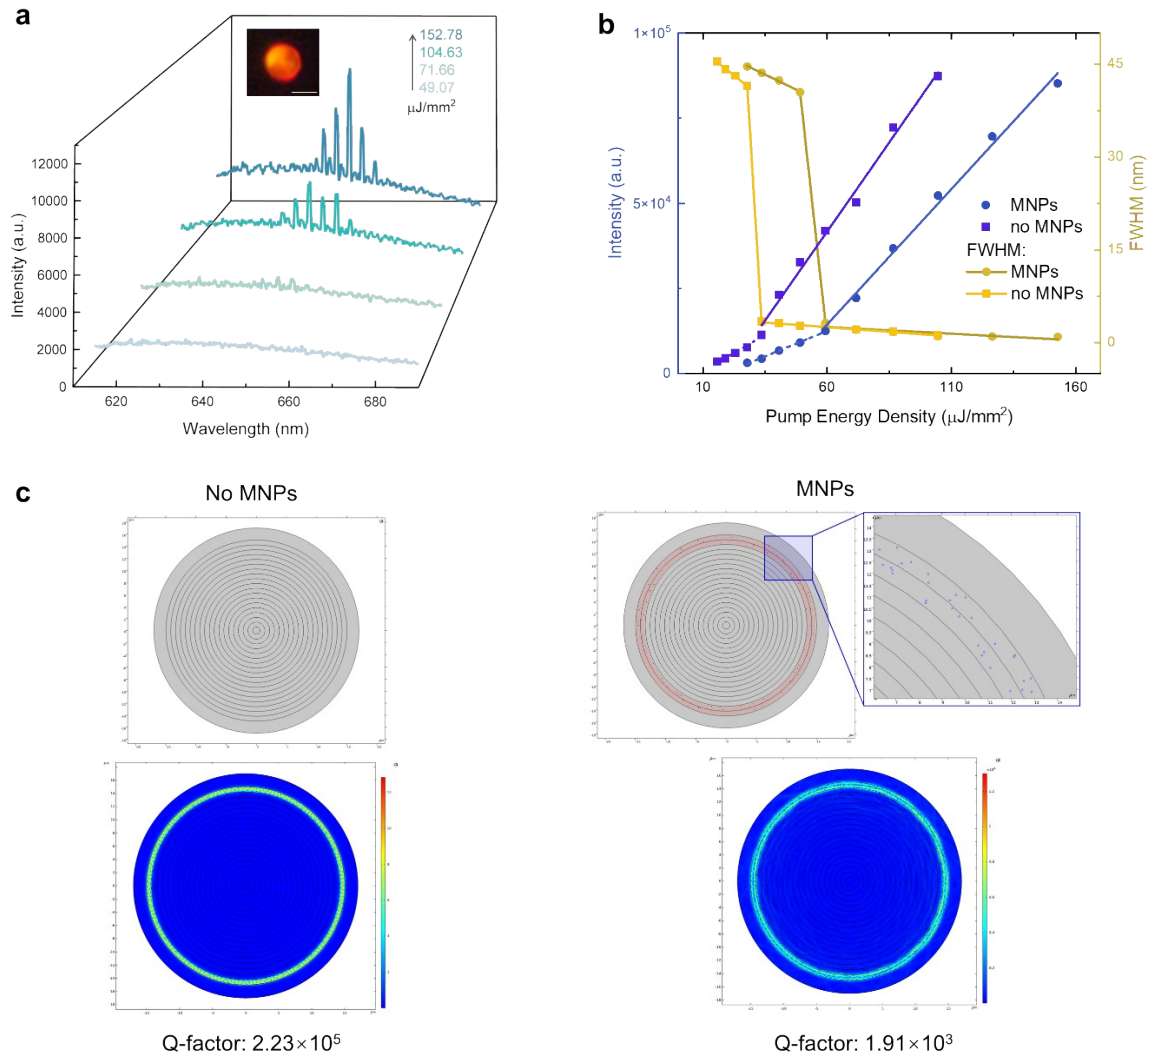

**Figure S3** (a) Photoluminescence spectra of lasing micromotor (MNP-doped CLC microdroplet) under different pump fluences. (b) Full-width-at-half-maxima (FWHM) and lasing threshold plot of lasing micromotor with MNPs and without MNPs. (c) Simulated Q-factor of lasing micromotor with MNPs (0.050 wt%) and without MNPs. (MNPs were randomly distributed around the droplet by inducing scattered particles inside the outer shell of the droplet model.)

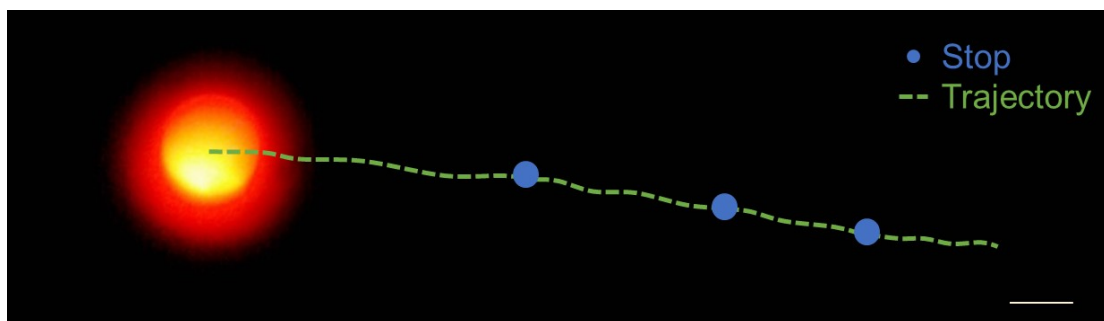

**Figure S4** Magneto-switchable behaviors. Scale bar: 20  $\mu\text{m}$ .

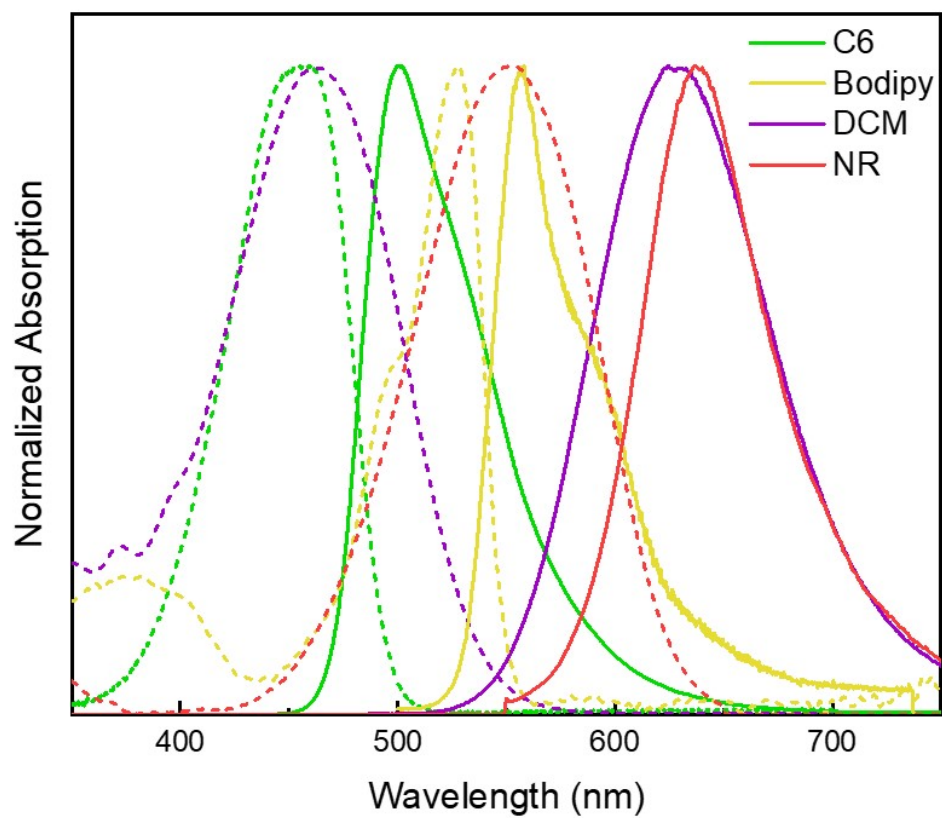

**Figure S5** Normalized absorption (dashed-line) and emission spectra (solid-line) of the corresponding dyes (C6, Bodipy, DCM, and NR) in immersion oil solution.

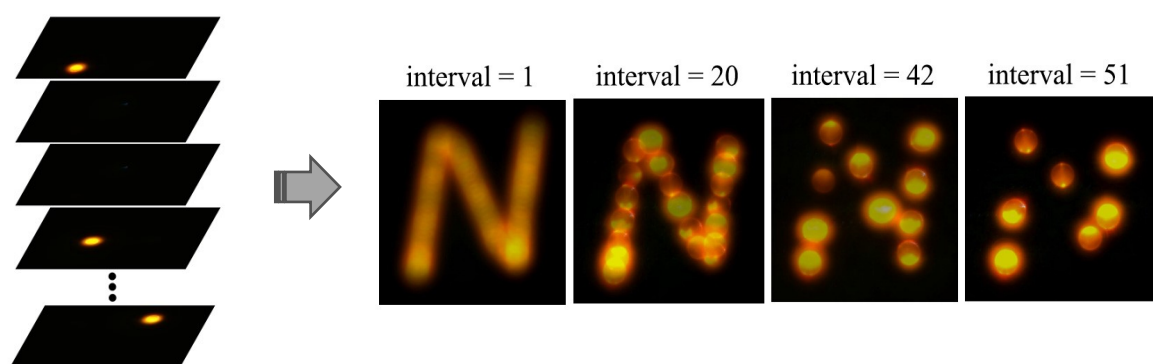

**Figure S6** Laser emissions from micromotor captured by high-speed CCD under different time frames. All the images captured under different time frame were then stacked together to form a trajectory image of the micromotor. The selection of time interval will also result in different writing patterns and resolution.

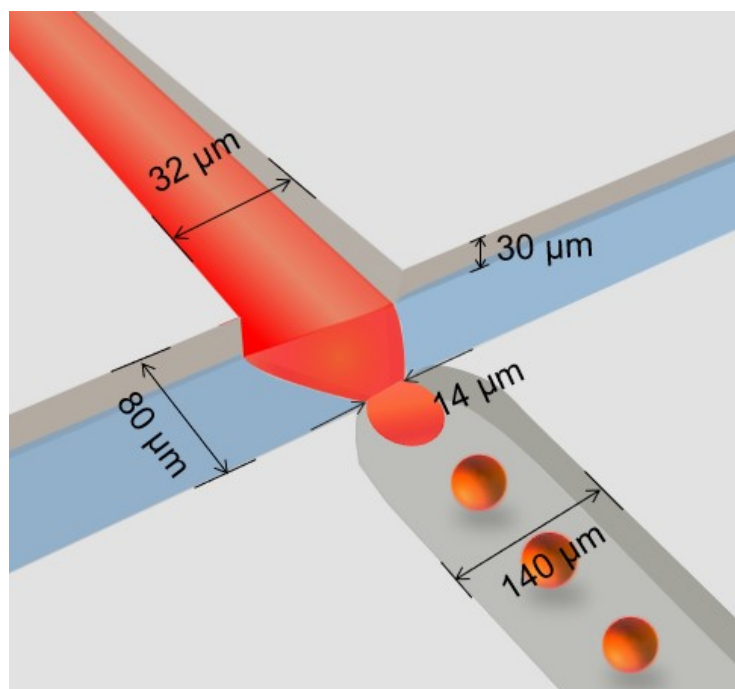

**Figure S7** Schematic of the microfluidic channel with accurate dimensions.
